# 1 Livestock heat stress risk in response to the extreme heat event (heatwave) 2 of July 2022 in the UK

3 Cooke, A. S.<sup>1</sup> and Rivero, M. J.<sup>2</sup>

4 <sup>1</sup> School of Life Sciences, College of Science, University of Lincoln, UK

5 <sup>2</sup> Net Zero and Resilient Agriculture, Rothamsted Research, North Wyke, Okehampton, UK

6

## 7 **Abstract**

8 On the 18<sup>th</sup> and 19<sup>th</sup> of July 2022, the UK experienced a record-breaking extreme heat event.  
9 For the first time, temperatures exceeding 40°C were recorded. Whilst this may seem  
10 exceptional or unprecedented, the progression of climate change is expected to increase both  
11 the likelihood and severity of such events. Livestock are vulnerable to heat stress, which  
12 manifests as losses to health and welfare, productivity, and sustainability. Here, we  
13 characterize the heatwave of July 2022 in the context of livestock heat-stress risk, with a  
14 focus on cattle. Meteorological data was obtained from 85 weather stations and the  
15 Comprehensive Climate Index (CCI) was calculated, hourly, for each station. The CCI was  
16 mapped across the UK for 18/07/22 and 19/07/22 and compared against heat stress risk  
17 thresholds. Across both days, >25% of sites experienced “severe” heat stress risk. On  
18 19/07/22 there was an “extreme” risk across >5% of sites. The site that experienced the  
19 highest risk was near Rugby, in the West Midlands. Across all sites, night-time temperatures  
20 fell below risk thresholds and may have mitigated some of the heat stress risk. Whilst there  
21 was some evidence of productivity losses, this was not conclusive. The impacts of this event  
22 on livestock were not just direct, but indirect through negative impacts on water and forage  
23 availability. The heatwave of July 2022 must serve as a warning for the UK livestock  
24 industry and these results may act as a case study of what the sector may be increasingly  
25 likely to experience in the future.

## 26 **1 Introduction**

27 In the last decades, livestock species have been severely affected by heat stress because of increasing  
28 temperatures, which has threatened animal welfare and decreased production (Carvajal et al., 2021);  
29 dairy cows produce less milk with lower milk quality characteristics, whilst in beef cattle, heat stress  
30 impairs reproductive performance of nursing cows, decreases growth rate, and worsens meat quality  
31 in growing/finishing animals (Summer et al., 2019). Actually, ca. 7% of the global cattle population is

32 currently exposed to dangerous heat conditions, and this percentage is projected to increase to ~48%  
33 before 2100 under a scenario of growing emissions, being poor and livestock-dependent tropical  
34 countries the most affected (Carvajal et al., 2021). In the Northern Hemisphere, the most severe heat  
35 stress is expected during the months of July and August, since in many instances the temperature does  
36 not drop enough to allow the animals to completely dissipate heat gained during the preceding day.

37 In July 2022 the UK and much of Europe experienced an extreme heat event (heat wave), with air  
38 temperature exceeding 40°C in some areas, setting new records as well as a new national record for  
39 the hottest temperature recorded in the UK of 40.3 °C at Coningsby in Lincolnshire. For the first time  
40 ever, for the days of July 18<sup>th</sup> and 19<sup>th</sup>, the Met Office issued a ‘Red Weather Warning’ for heat,  
41 meaning “*dangerous weather*” and “*risk to [human] life*” (Met Office, 2022). Whilst such  
42 temperatures may be commonplace across much of the world, they are not in the UK. Consequently,  
43 UK livestock are not physiologically adapted or acclimatised to such extremes and not necessarily are  
44 livestock systems. Indeed, adaptation for cold weather has arguably been preferable. Furthermore,  
45 such events are predicted to be more frequent and more severe due to the impacts of climate change  
46 (IPCC, 2022).

47 Heat waves (consecutive days of severe or extreme heat) can cause heat stress events thus reducing  
48 animal performance and leading to welfare, economic, and environmental losses in livestock systems  
49 (Dunn et al., 2014; Garner et al., 2017; Lees et al., 2019). The effect of these extreme conditions can  
50 be easily verified on dairy cattle since the monitoring of daily records of milk production can quickly  
51 identify any drop in yield with and the associated immediate effect on the income generated.  
52 However, for beef cattle or lamb, the detrimental effect of heat stress can take longer to be identified,  
53 e.g., between two consecutive weighing events. Actually, one of the most popular heat stress indices,  
54 i.e., the Temperature-Humidity Index or THI, had its earliest example of application as the basis for  
55 livestock response functions for milk production decline of dairy cows in 1964 (Berry et al., 1964;  
56 Hahn et al., 2009).

57 The THI has for several years served as a de facto standard for classifying thermal environments in  
58 many livestock production and transport situations, and a basis for strategic and tactical management  
59 practices during seasons other than winter (Hahn et al, 2009). Modifications to the THI have been  
60 proposed to overcome limitations related to lack of inclusion of airflow and radiation heat loads  
61 (Mader et al., 2006). To overcome these limitations, Mader et al., (2010) developed the  
62 Comprehensive Climate Index (CCI) that incorporates major environmental components that are  
63 experienced over a range of hot and cold conditions and established environmental stress thresholds  
64 reflecting stress levels based on environmental conditions, management levels, and physiological  
65 status. CCI also works on a Celsius basis as opposed to THI which works off of Fahrenheit. This

66 study aimed to characterise the extent and spatial and temporal nature of the extreme heat event that  
67 occurred in the UK on 18 and 19 July 2022 in the context of livestock heat stress risk.

## 68 **2 Methods**

69 Meteorological data was taken from the Met Office Integrated Data Archive System (MIDAS)  
70 network, accessed via the Centre for Environmental Data Analysis (CEDA) (Met Office, 2012).  
71 Stations were selected if they met both of two criteria: (1) recorded data for all of the four weather  
72 variables of air temperature, relative humidity, windspeed, and solar radiation (2) were on mainland  
73 Great Britain (inc. Anglesey) or Northern Ireland. A total of 85 stations met these criteria (Figure 1).  
74 Individual stations were identified by their source ID (SRC\_ID) as per the MIDAS database.

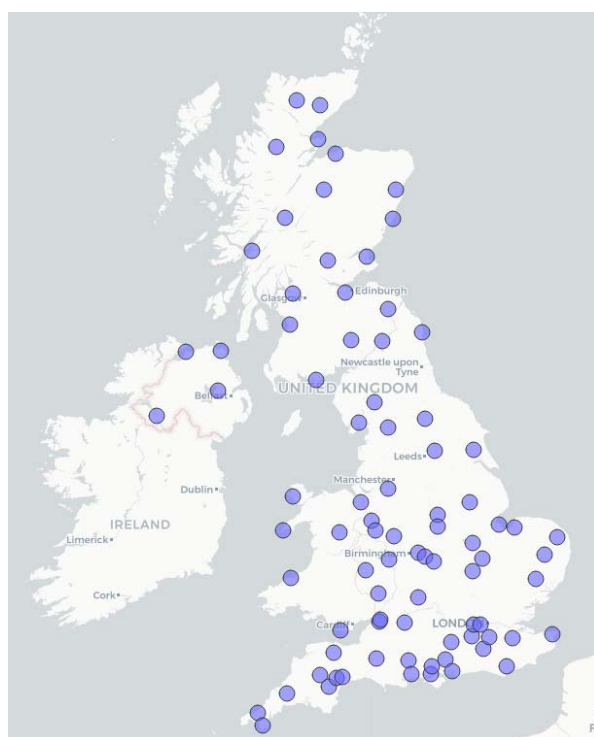

75

76 Figure 1 – Location of MIDAS weather stations used in this study.

77 Hourly readings of the four weather variables to calculate an hourly CCI score (calculations as per  
78 Mader et al. (2010)) per station were used (i.e., air temperature, relative humidity, wind speed, solar  
79 radiation). MIDAS reports solar radiation in kilojoules per square metre for the hour, these values  
80 were divided by 3.6 to give Watts per square metre, as necessary for the CCI calculation. Wind speed  
81 was also converted from knots to metres per second. In 2017 one station (Londonderry SRC\_ID  
82 56963) had thirteen records of negative solar radiation values, which were removed. If readings were  
83 not present for all of the four required variables, the record for that time point for that station was

84 removed. CCI values could then be compared to heat risk thresholds taken from Mader et al. (2010)  
85 (Table 1). Rainfall data was also obtained to compare to previous years.

86 Table 1 – Arbitrary comprehensive climate index thermal stress thresholds. With severe thresholds  
87 capable of causing death of animals and extreme thresholds having a high probability of causing death  
88 of high-risk animals. Adapted from Mader et al. (2010).

| Heat risk      | Threshold (CCI) |
|----------------|-----------------|
| Extreme danger | > 45            |
| Extreme        | > 40 – 45       |
| Severe         | > 35 – 40       |
| Moderate       | > 30 – 35       |
| Mild           | > 25 – 30       |
| No stress      | < 25            |

89

90 Heat maps were created for each of the two days from the hour with the highest mean national CCI  
91 values. Spatial interpolation for the maps was performed using the Inverse Distance Weighting (IDW)  
92 technique. For the period 16/07/22 to 21/07/22 (heat event  $\pm$  two days) national hourly CCI figures  
93 were graphed showing the 50<sup>th</sup> percentile (mean), 75<sup>th</sup> percentile (3<sup>rd</sup> quartile) and 95<sup>th</sup> percentile.  
94 Additionally, the station with the highest mean CCI across the two days was plotted. Air temperature  
95 and CCI were directly compared across the extreme heat event to investigate the extent of differences  
96 between the two measures. For each individual component of CCI a comparison was made (using  
97 midday readings) between the extreme heat event of 2022 (18/07/22 to 19/07/22) and, for each  
98 previously July of 2017-2021, the two consecutive days with the highest CCI averaged across all the  
99 met stations.

100 For the purposes of contextualising the wider implications of the extreme heat event on the livestock  
101 industry, national slaughter data and milk data were obtained from Department for Environment, Food  
102 and Rural Affairs (DEFRA, 2022a, 2022b) and on-farm cattle deaths obtained via a request to the  
103 Rural Payments Agency under the Environmental Information Regulations (2004), equivalent data for  
104 sheep was unavailable as reporting of individual sheep deaths is not required in law. To illustrate the  
105 aspect of the ground cover prior, during and after the heatwave, satellite imagery and Normalised  
106 Difference Vegetation Index (NDVI) were taken from NASA (NASA, 2022).

### 107 *2.1.1 Software*

108 Heat maps were created using QGIS 3.26.1 (QGIS, 2022). Other figures were created in R Studio  
109 1.2.1335 (running of R 4.2.0) using packages ‘ggplot2’ and ‘Cairo’ (R Core Team, 2021; R Studio  
110 Team, 2020; Urbanek and Horner, 2020; Wickham, 2016).

### 111 **3 Results**

112 Over the July periods of six years analysed (2017 to 2022), 99 of the 100 highest air temperatures  
113 were recorded occurred on 18/07/22 or 19/07/22, with the greatest being 40.0°C in Lincolnshire  
114 (SRC\_ID 384) at 16:00 on 19/07/22 (this differs from widely publicised records due to different  
115 temporal resolutions). CCI values gave a similar, albeit less extreme, result, with 54 of the top 100  
116 values being recorded on 18/07/22 or 19/07/22.

117 July 2022 also yielded particularly low rainfall, with a national mean of 48.4mm, the lowest since  
118 1999. From 01/07/22 to 18/07/22 mean total rainfall was 19.0mm, thus the majority of rain occurred  
119 after the heat wave. Daily mean rainfall across the UK was 0.088 on both 18/07/22 and 19/07/22, with  
120 90.7% of MIDAS weather stations recording no rain on the 18<sup>th</sup> and 95.0% recording no rainfall on  
121 the 19<sup>th</sup>.

122 Both days with the Red Weather Warning showed high CCI scores across the country, particular for  
123 southern and eastern regions (Figure 2). Whilst CCI did reduce in some western areas on the second  
124 day, this was also when levels peaked elsewhere. This resulted in a severe heat risk across much of  
125 the country and in some instances an extreme heat risk. The majority of locations experienced at least  
126 a moderate risk (Figure 2). On 18/07/2022 there were four occasions, each at different stations, where  
127 CCI exceeded the threshold for extreme heat risk, on 19/07/2022 there were 22 occasions.

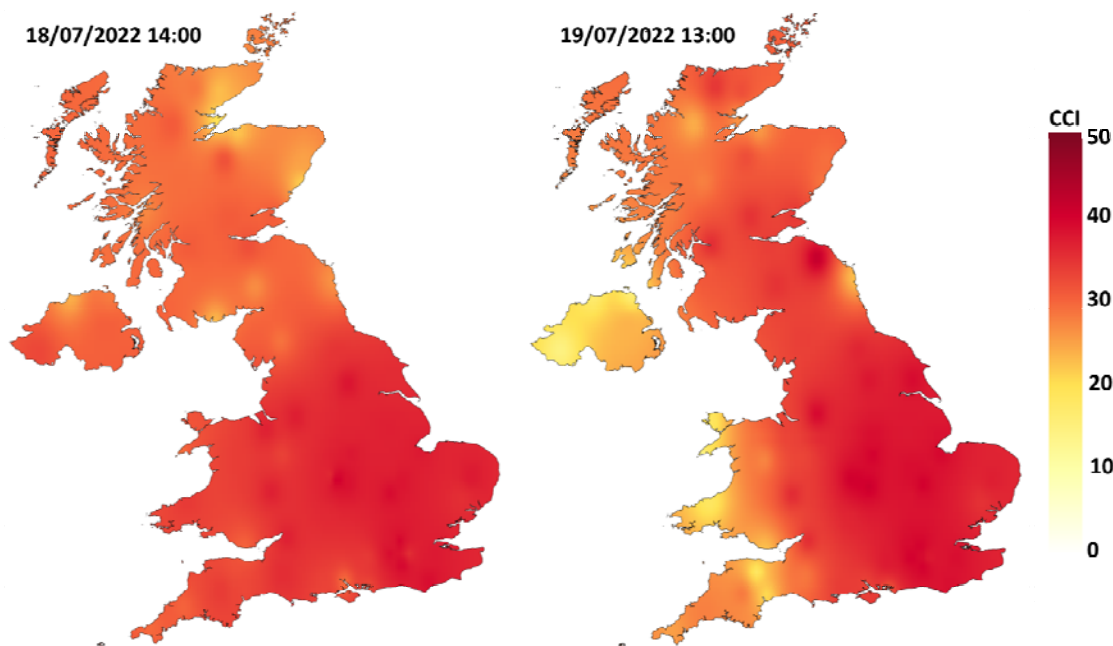

128

129 Figure 2 – CCI maps for the UK at 14:00 on 18/07/22 and at 13:00 on 19/07/22. Maps are for the  
130 period with the highest mean CCI for the given day. Note that data extrapolated to island locations is  
131 derived from mainland weather station data.

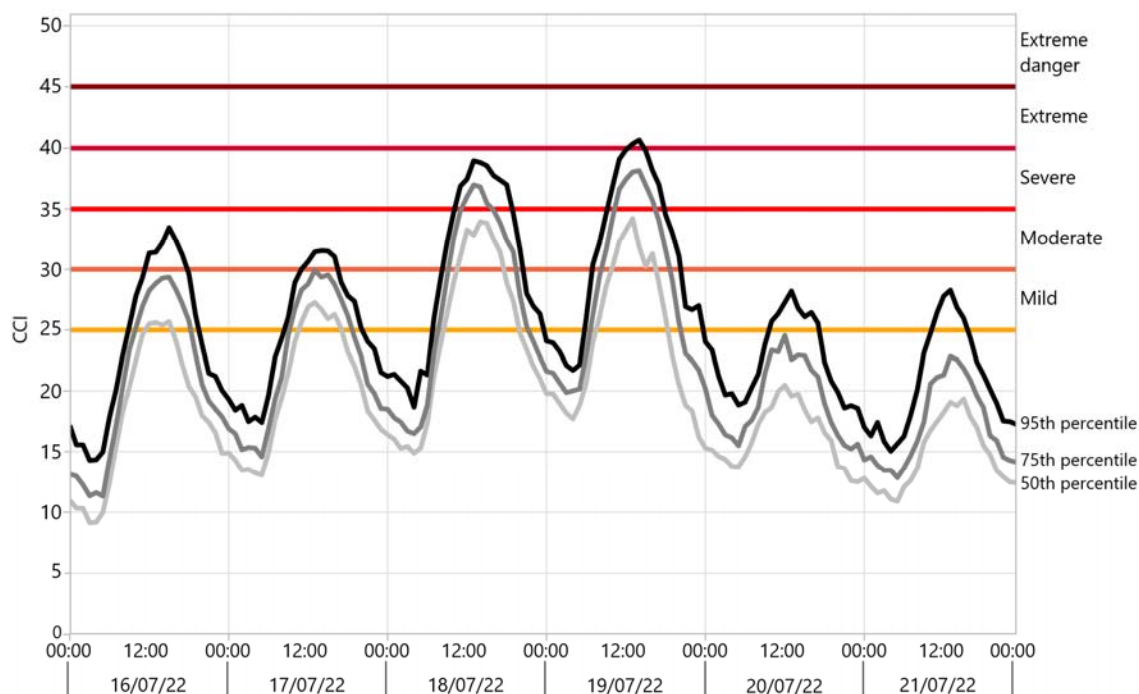

132

133 Figure 3 – Summary of heat stress risk across the UK from 16/07/22 to 21/07/2022 including 50<sup>th</sup>,  
134 75<sup>th</sup>, and 95<sup>th</sup> percentiles.

135 The station with the highest mean CCI value across the two days was in Coventry (SRC\_ID 24102);  
136 however, this station was in a heavily urbanised area, and thus not typical of livestock systems.  
137 Instead, the station with the next highest mean CCI was taken; this was a site (SRC\_ID 595)  
138 approximately 13 km South-East of Coventry, near Rugby. The site and surrounding area is rural,  
139 agricultural in use, with some livestock rearing < 500m from the site – based on satellite imagery  
140 taken 16/06/21 (Google, 2021). On the days leading up to 18/07/22, the site experienced weather that  
141 posed a moderate heat risk to livestock. On 18/07/22, there was a severe heat stress risk across most  
142 of the daytime (Figure 4). This was also the case on 19/07/22, however for a period of approximately  
143 2 hrs CCI thresholds for extreme heat stress risk were exceeded. During the night, between those  
144 days, CCI levels remained relatively high only dropping below 25 for a period of a few hours. The  
145 two days following the extreme event were far cooler and yielded no apparent heat stress risk.

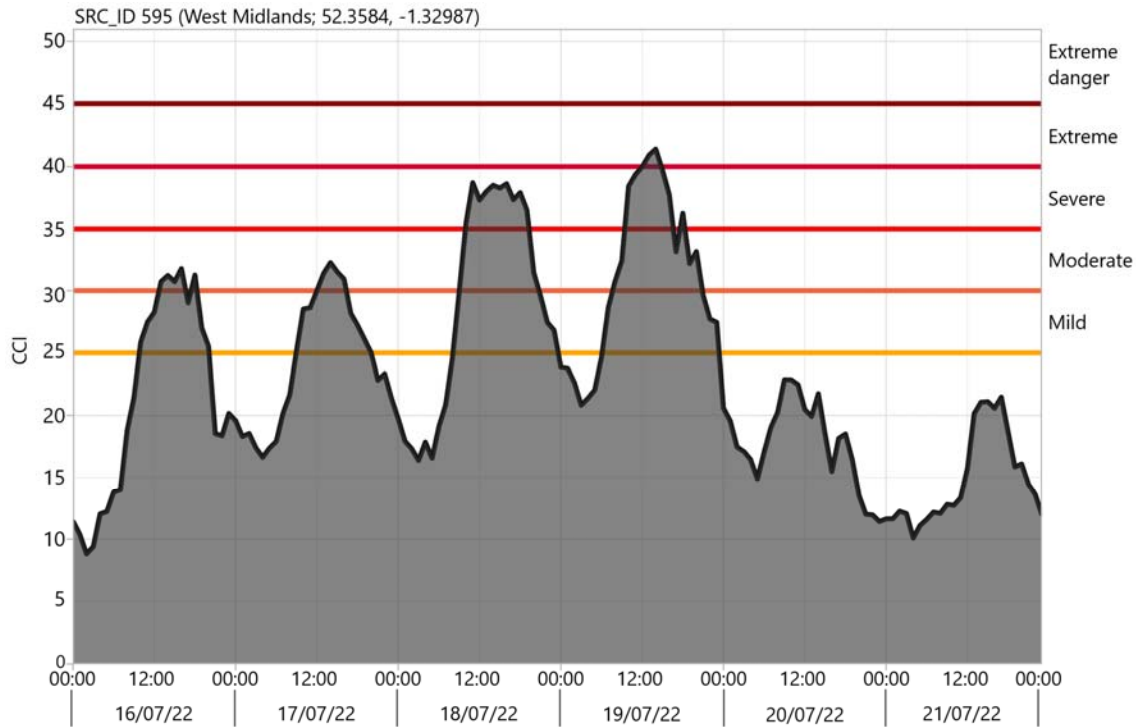

146

147 Figure 4 – CCI patterns at site SRC\_ID 595 during the two days of the “Red Weather Warning”  
148 (18/07/22 and 19/07/2022) and two days either side.

149 The relationship between air temperature and CCI over the two days was, on average, linear with an  
150 approximately 1:1 relationship (Figure 5). However, many individual points yielded air temperature  
151 and CCI values that were nearly 10 points out from each other. For example, the point with the  
152 highest CCI had a value of 41.2, despite air temperature being just 33.9°C. The greatest difference  
153 between CCI and air temperature was 8.9 (CCI = 31.4, air temp. = 22.5).



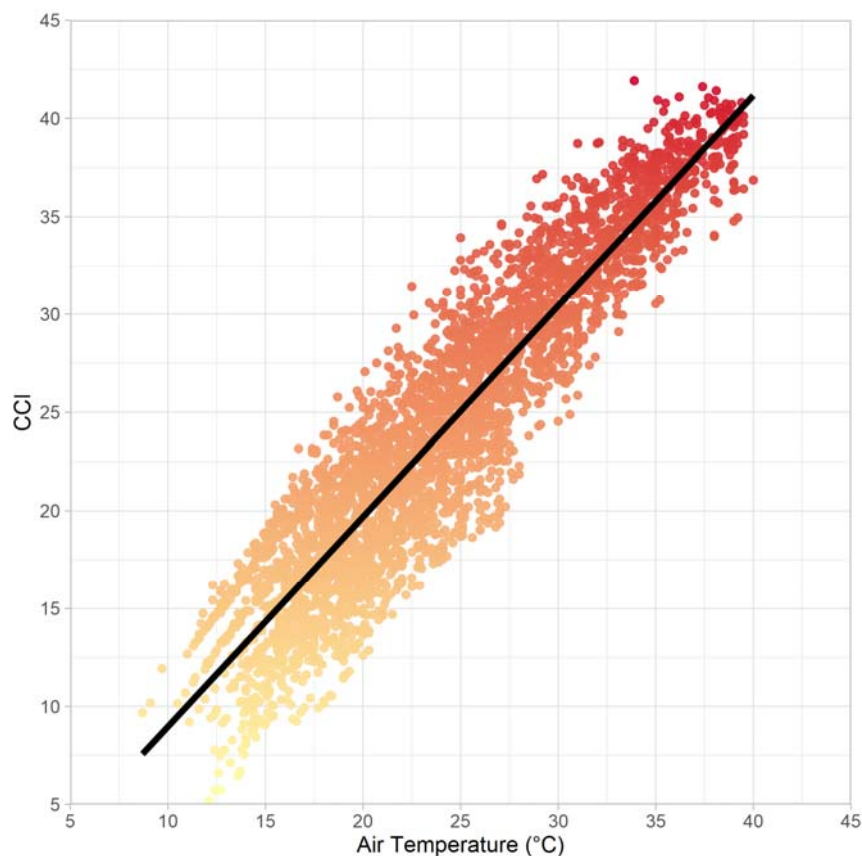

154

155 Figure 5 – Relationship between CCI and air temperature (°C) across 18/07/22 and 19/07/22. R =  
156 0.86.

157 Looking at the individual factors that are used to calculate CCI, differences were clear between the  
158 extreme heat event of 2022 compared to the two consecutive days in previous Julys with the highest  
159 CCI (Figure 6). Air temperature was considerably higher than typical and humidity considerably  
160 lower. There appeared to be no large difference in windspeed. The range of solar radiation observed  
161 was similar to usual and skewed towards high levels of radiation.



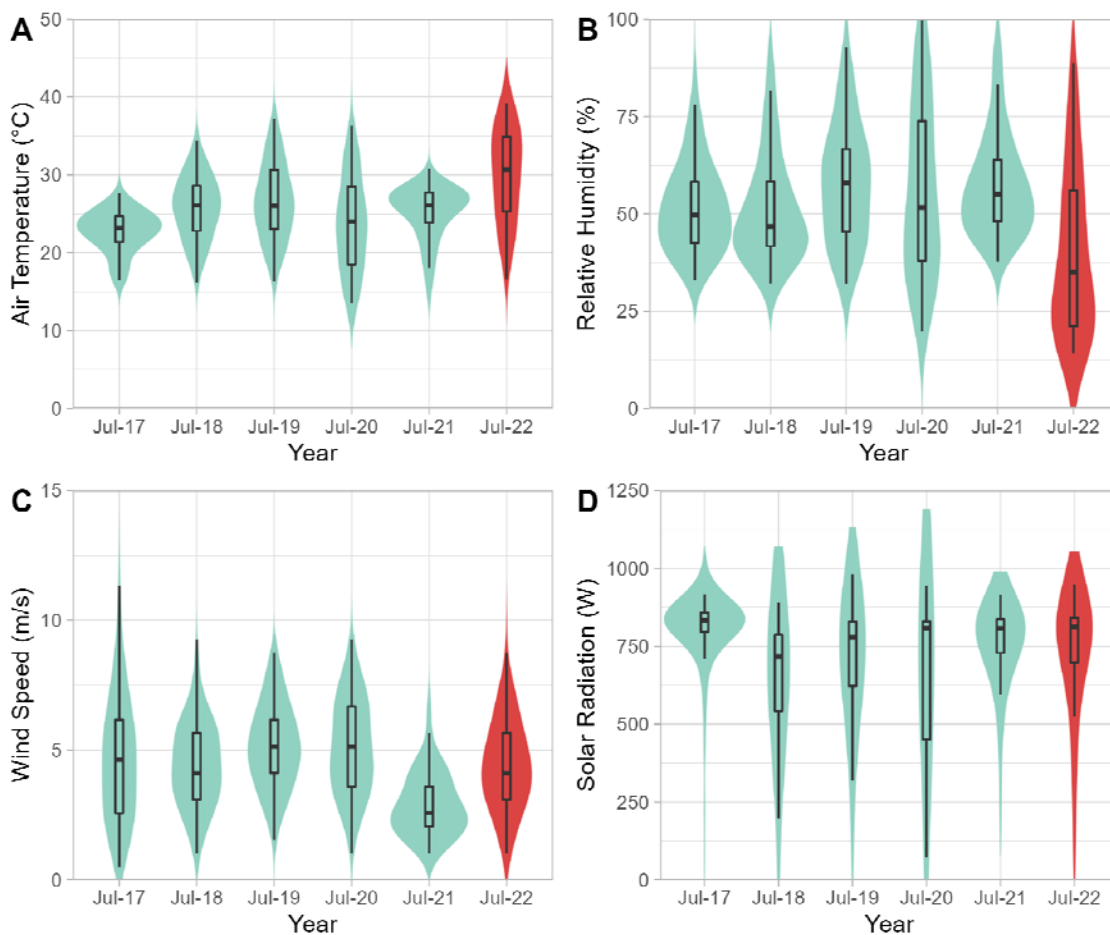

162

163 Figure 6 – Comparison of weather variables between the extreme heat event of 18/07/22 – 19/07/22  
164 compared to the two consecutive days with the highest CCI of previous Julys (2017-2021). A: Air  
165 temperature (°C), B: Relative humidity (%), C: Wind speed (m/s), D: Solar radiation (W). Dates for  
166 previous years were: 17-18/07/17, 26-27/07/18, 24-25/07/19, 30-31/07/20, 21-22/07/21.

167 Satellite images spanning periods before, during and, after the heat event show a clear impact of the  
168 weather on vegetation, particularly across the east side of the UK. Normalised Difference Vegetation  
169 Index data showed a rapid decline in green vegetation during and after the heat event (Figure 7).

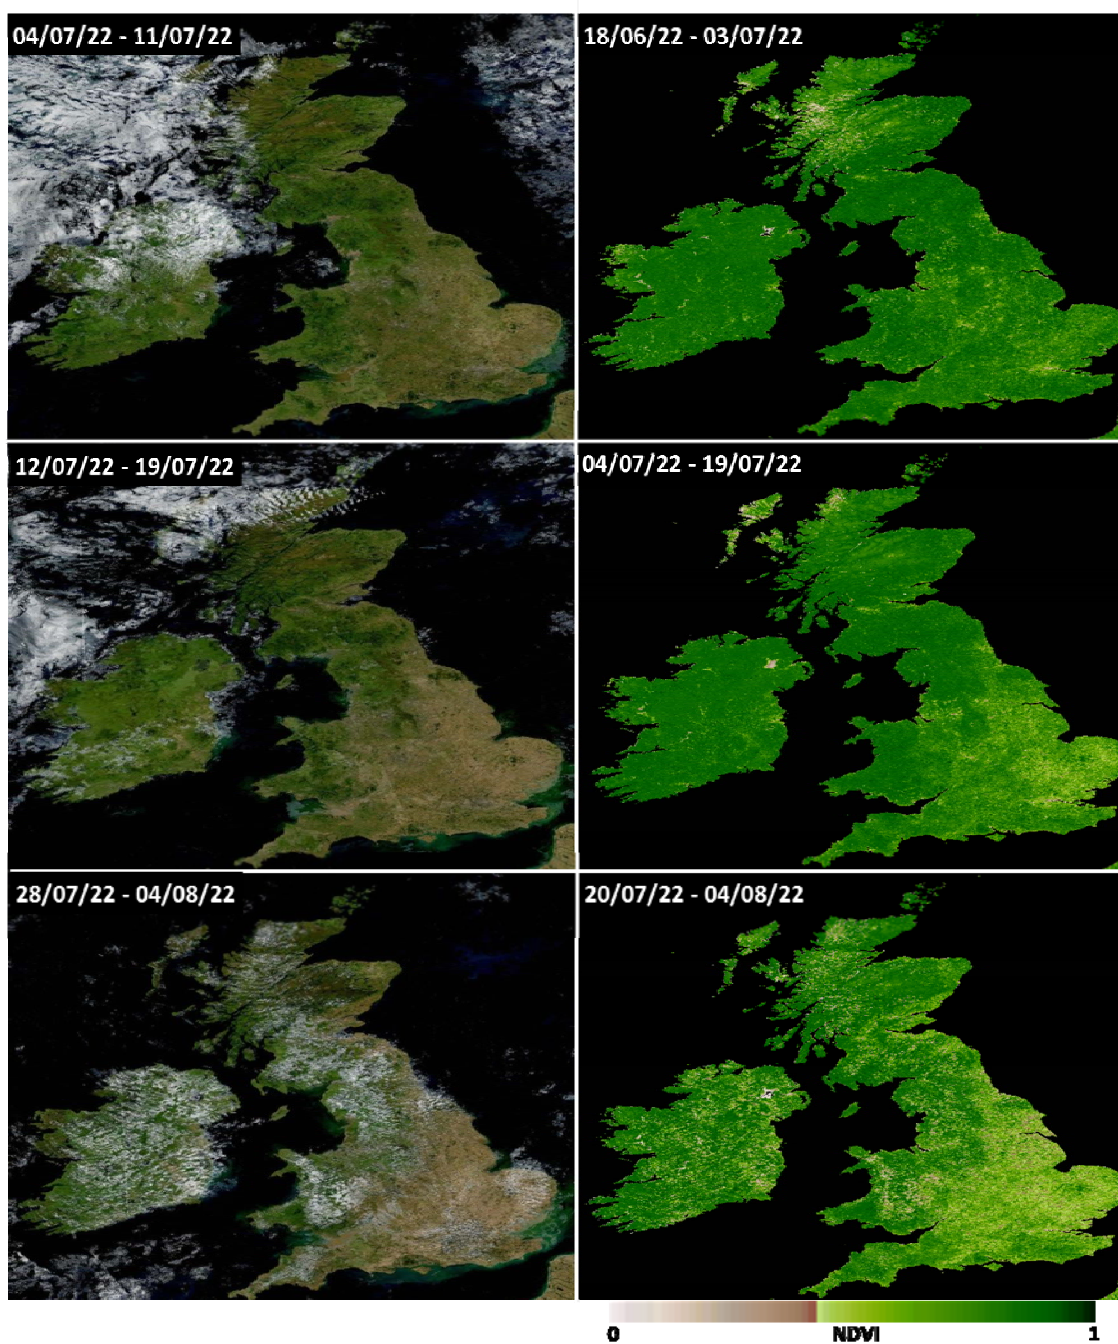

170

171 Figure 7 – Satellite images taken before, during, and after the period of extreme heat in July 2022.  
172 Left side: Land Surface Reflectance (true colour, 8-day composite). Right side: Normalised  
173 Difference Vegetation Index (NDVI) (16-day composite). Data originates from Moderate Resolution  
174 Imaging Spectroradiometer (MODIS) onboard the Earth Observing System (EOS), obtained via  
175 NASA Worldview (NASA, 2022).

176 The total number of cattle and sheep sent to slaughter (1307 thousand) across the UK in July 2022  
177 was lower (-10.6%) than the mean for the same month on the previous 5 years (1462 thousand) as  
178 well as being the lowest across these years (Table 2) (DEFRA, 2022a). This difference appeared to be

179 predominantly due to a reduction in sheep being sent to slaughter (clean sheep -11.7% compared to  
 180 mean). Milk yield available to dairies for July 2022 was 1176 million litres, representing 16.0% of the  
 181 year to date. From 2018-2021 the mean of 1182 million litres, representing 16.2% of the year to date.  
 182 On-farm cattle deaths in July 2022 were also lower than previous years.

183 Table 2 – Monthly figures of livestock slaughter, milk yield, and on-farm cattle deaths across the UK  
 184 for July of years 2017 to 2022 (DEFRA, 2022a). Value in brackets is the proportion (%) that the  
 185 number represents of the total slaughters/litres in that calendar year from January to July. \*milk yield  
 186 data for July 2017 was removed as reporting methodologies changed between then and July 2018.

|                                               | 07/2017     | 07/2018     | 07/2019     | 07/2020     | 07/2021     | 07/2022     |
|-----------------------------------------------|-------------|-------------|-------------|-------------|-------------|-------------|
| Number of animals slaughtered (thousand head) |             |             |             |             |             |             |
| Steers                                        | 78 (13.3)   | 81 (13.6)   | 78 (13.4)   | 88 (14.9)   | 79 (13.8)   | 76 (13.6)   |
| Heifers                                       | 54 (13.0)   | 59 (13.6)   | 60 (13.2)   | 68 (14.1)   | 63 (13.3)   | 64 (13.4)   |
| Young bulls                                   | 25 (20.2)   | 23 (18.9)   | 24 (20.3)   | 24 (21.1)   | 20 (18.0)   | 21 (19.1)   |
| Cows & Bulls                                  | 52 (14.9)   | 60 (15.6)   | 53 (13.4)   | 60 (15.9)   | 51 (14.2)   | 52 (14.2)   |
| Calves                                        | 7 (10.9)    | 7 (11.7)    | 9 (12.2)    | 5 (9.8)     | 5 (14.3)    | 5 (11.6)    |
| Clean sheep                                   | 1102 (15.7) | 1031 (15.3) | 1090 (15.7) | 1292 (19.4) | 1084 (17.5) | 989 (14.9)  |
| Ewes & Rams                                   | 136 (15.3)  | 131 (15.1)  | 148 (15.7)  | 154 (17.6)  | 111 (17.5)  | 100 (14.7)  |
| TOTAL                                         | 1454 (15.4) | 1392 (15.1) | 1462 (15.4) | 1691 (18.5) | 1413 (16.8) | 1307 (14.8) |
| Milk yield (million litres)                   |             |             |             |             |             |             |
| Cow's milk                                    | *           | 1167 (16.3) | 1188 (16.2) | 1187 (16.4) | 1186 (16.0) | 1176 (16.0) |
| On-farm deaths (single head)                  |             |             |             |             |             |             |
| Cattle                                        | 28,048      | 31,982      | 28,573      | 26,085      | 26,427      | 24,749      |

187

## 188 **4 Discussion**

189 The heat wave of July 2022 posed a sustained severe, and occasionally extreme, heat stress risk to  
 190 livestock across many areas of the UK. The effects were felt most in the Midlands and South-East,  
 191 with other regions suffering to a lesser extent and thus there being a potentially lower risk to animals.  
 192 Climate modelling predicts that such events are to become more frequent and more extreme due to the  
 193 effects of climate change (Meehl and Tebaldi, 2004). The impact that heat waves have on livestock  
 194 depends on variables such as duration (e.g., consecutive days above the critical threshold) and  
 195 intensity (e.g., level of heat stress reached and number of hours animals are exposed) of the event, and  
 196 physiological stage, breed, acclimation capacity of the animals. The UK livestock industry needs to  
 197 invest now and prepare itself for that eventuality to mitigate against the animal welfare,  
 198 environmental, and economic losses that livestock heat stress can yield.

199 Although daytime temperatures were high, a reasonable degree of night-time cooling was evident,  
 200 which is likely to have alleviated overall risk. If this event had lasted into a third or fourth day, that

201 may not have been the case. Night-time cooling may be an effective natural method to alleviate the  
202 thermoregulatory limitations of a warm climate (Scott et al., 1983). The ability of cattle to cool  
203 (dissipate heat) at night appears to be important for minimizing overall heat load and contributing to  
204 the maintenance of normal behaviour and feeding activity (Mader et al., 2006). Cattle that do not cool  
205 down at night are prone to achieving greater body temperatures during hot days, whereas cattle that  
206 can cool at night can keep peak body temperatures at or near those of cattle that tend to consistently  
207 maintain lower body temperatures (Mader et al., 2010a). In moderate-productive dairy cows, cool  
208 nights may help to cope with the heat load (Jara et al., 2016); Beede et al. (1993) mention that the  
209 night cooling can restore milk production through its effect in restoring dry matter intake. Cool period  
210 of less than 21°C for 3 to 6 h will minimize the decline in milk yield (Igono et al., 1992), whereas  
211 cows exposed to heat stress for 8 consecutive days show decreased milk fat and protein contents  
212 (Ouellet et al., 2019). When using milk yield and mortality risk as indicators, it has been concluded  
213 that temperature drops at night below the traditional 72 THI threshold alleviate the effects of heat  
214 stress in dairy cows (Nienaber and Hahn, 2007). Regarding duration of heat stress and acclimation  
215 capacity of each cow, Galán et al. (2018) performed a systematic review and found that these two  
216 factors affect the value of the response; rectal temperature, respiration and heart rates are observed to  
217 increase during the early days of exposure but then to drop while the fall in dry matter intake is less  
218 severe after three weeks of warm temperatures, suggesting that cows start to acclimate. The duration  
219 of the acclimation process (9 to 14 days) varies with breed (Bernabucci et al., 2010). In the case of  
220 feed lot cattle, West (2003) found that severe heat waves increase the likelihood for mortality, and  
221 several hours of THI > 84 with little or no night-time recovery of THI = 74 can result in the death of  
222 vulnerable animals. Thus, global warming could create conditions that not only impair productivity of  
223 cattle but increase mortality of cattle in the absence of protective facilities.

224 Dunn et al. (2014) studied two heat waves that occurred in the UK with the peak temperatures taking  
225 place on 10 August 2003 and 19 July 2006 respectively. The authors found that only four herds (out  
226 of 17 analysed) showed any indication of a decrease in milk monthly yields during the summers of  
227 2003 and 2006 and suggested that the monthly measurement interval may have masked the impacts as  
228 the persistence of any effect of heat stress appears to be low. They reported that there are 0.8 days  
229 with THI > 70 on average in the UK (over 1973–2012), and during the two years with summer  
230 heatwaves this value increased to 2.7 and 2.8 days (2003 and 2006). The authors project that the  
231 number of days exceeding the THI threshold for the onset of heat stress (i.e., 70) will increase. For  
232 southern parts of the UK this could increase from an average 1–2 per year to over 20 per year by  
233 2100, with correspondingly more during heatwave events.

234 The reduction in green vegetation appeared to be as a direct consequence of the extreme heat event,  
235 hot weather, and low rainfall around that time. The reduction in vegetation availability and production  
236 will limit forage dry matter allowance for ruminant herds/flocks. This could lead to associated welfare

237 and economic losses if carrying capacity falls below stocking rate, or if forage quality deteriorates.  
238 Grass typically has a high moisture content and in normal conditions a large portion of ruminants  
239 water intake is through grass consumption (Minson, 2012). The drying of grass may therefore reduce  
240 ruminant water intake, increasing heat stress risk. The ability for livestock to compensate, through  
241 voluntary water intake from troughs (or alike) will vary from farm to farm. Furthermore, as ambient  
242 temperature increases, so may water intake requirements (Arias and Mader, 2011; Winchester and  
243 Morris, 1956). Water intake is typically greatest when water temperatures are warm (Huuskonen et  
244 al., 2011; Petersen et al., 2016), however there is a tipping point where water too warm will result in  
245 reduced intake (Parish and Karisch, 2022). Having to walk longer distances to obtain water,  
246 potentially uphill and out of shade cover, may also contribute towards heat stress risk.

247 The reason behind the low slaughter numbers and slightly low milk yields compared to the average of  
248 previous years is unclear and is not conclusively linked to the heat wave event. Data from individual  
249 farms, particularly dairies in the Midlands and South-East, may provide insight into the direct impact  
250 of this event at local levels. The deployment of scientific resources in advance of such events in the  
251 future would help to better quantify and understand these impacts on UK livestock. This could include  
252 digital boluses, thermal imaging, welfare assessments, and physiological and immunological sampling  
253 Despite not having such high-resolution data in this instance, it is highly likely that large numbers of  
254 livestock suffered welfare losses by means of discomfort, though without long-term impacts. It is also  
255 likely that a smaller number of livestock suffer more acute effects resulting in physiological harm.

256 The location of highest air temperatures did not exactly match up to those with greatest CCI scores –  
257 though the two do strongly correlate. This highlights a concern that farmers could inadvertently  
258 underestimate the heat stress risk to their cattle, by as much as two or potentially even three risk  
259 categories, if they were to rely on air temperature forecasts alone, highlighting the value of  
260 considering additional weather variables. Air temperature and CCI differed by as much as 10-15  
261 points. Reporting that focuses on air temperature, typical of mainstream weather reporting, risks farms  
262 underestimating the risk to their livestock. There may, therefore, be the need for more tailored  
263 reporting for the livestock sector.

264 The CCI includes air temperature, relative humidity, wind speed and solar radiation, therefore  
265 allowing to integrate the multiple environmental factors animals perceive when they graze in the  
266 fields. In a systematic review, Galan et al., (2018) found that 86% of the studies use the temperature  
267 and humidity together (including THI) as a measure of climate, while 36% of the studies also factor in  
268 solar radiation, wind speed or other indices that include them (including CCI). These indices are used  
269 especially in studies of pasture systems (66% if studies that include rainfall are also considered). The  
270 CCI could be the most promising thermal index to assess heat stress for housed dairy cows (Yan et al.,  
271 2021). Dunn et al, (2014) stress that solar radiation implicitly influences the basic THI because THI



272 and solar radiation are positively correlated, whilst wind speeds may be unrepresentative of that  
273 experienced by dairy cattle, because wind speeds are more dependent on local topography than are  
274 temperature and humidity. On the other hand, Yan et al., (2021) found that the CCI showed a better  
275 relationship with the animal-based indicators (i.e., rectal temperature, skin temperature, and eye  
276 temperature) of heat stress. CCI has the potential to replace the temperature–humidity index in  
277 quantifying the severity of heat stress in dairy cows. It is worth noting that, the thresholds for heat-  
278 stress risk are arbitrary (Mader et al., 2010b). The exact risk to livestock is dependent on a variety of  
279 factors, such as animal characteristics and acclimation. Notably, the hottest areas during this event  
280 were in the Midlands and East, which are by no means typically the warmest places in the UK. The  
281 critical thresholds proposed by Mader et al. (2010) for CCI were theoretical and based on beef cattle,  
282 that are less sensitive to heat stress than dairy cows. These differences are due to breeds  
283 characteristics, production, metabolism, feeding plans, and management systems (Summer et al.,  
284 2019). Mader et al. (2010) stressed that CCI has a flexible threshold due to the animals’ susceptibility  
285 to environmental factors, previous exposure, age, body condition and isolation. Regardless of the  
286 cattle category and the production systems, heat stress impairs primarily animal welfare (Summer et  
287 al., 2019).

288 The risks characterised in this study also highlights the potential risk to livestock that are housed or in  
289 transportation. Factors such as orientation, stocking density, materials, and ventilation, can be major  
290 contributors to indoor housing and transportation conditions. Whilst there are regulations stating that  
291 vehicles must be able to maintain temperatures of 5-30°C, this only applies to journeys in excess of 12  
292 hrs within the UK. In a scenario where temperatures approach closer to 40°C this is likely insufficient,  
293 especially if the risk of vehicle or ventilation malfunction is considered. It is advised that future  
294 developments be considerate of extreme heat (and cold) in the design of housing facilities and  
295 vehicles for any livestock.

#### 296 **4.1 Mitigation and intervention**

297 Unlike humans, livestock have no forewarning of weather, no ability to plan for it, and limited  
298 capabilities to mitigate it. It is thus duty of their owners and responsible agencies to protect them.  
299 With such events predicted to become more probable and more severe, it is important that both short-  
300 and long-term strategies are implemented to reduce the heat risk to animals in future events.

301 The high dry matter intake requirement of ruminants may make the utilisation of shade difficult.  
302 Animals may need to break shade cover in order to graze, putting them at increased heat risk.  
303 Providing conserved forage (e.g., silage, hay) in shaded areas could reduce the need for animals to  
304 leave shade and reduce the energy they have to expend to feed. Converting areas of pasture to  
305 silviculture could also address this, by providing an environment that allows cattle to graze with a  
306 high level of shade provision, representing a potential synergy between animal welfare and

307 environmental sustainability (Rivero and Lee, 2022). As well as providing shade, tree cover has also  
308 been found to reduce ground surface and soil temperatures (Lerman and Contosta, 2019).

309 Provision of water is essential and water troughs should be placed in accessible areas in or near shade,  
310 to prevent cattle overexerting themselves to reach it. Furthermore, water must be prevented from  
311 getting too hot as this can exacerbate heat stress. A number of small portable trough solutions (named  
312 such as ‘mini’, ‘micro’ or ‘drag’ troughs) are available. These are quick and easy to deploy and in  
313 preparation for an extreme heat these can be placed in shaded areas and/or at a high frequency to  
314 ensure ease of access and proximity.

315 Another long-term solution worthy of consideration is the genetic composition of UK livestock and  
316 the extent to which animals are suited for a warming climate and extreme heat. This is arguably most  
317 important in the context of dairy cattle, due to the high metabolic demand of milk production. There  
318 might be a case for including new non-economic traits in the breeding objectives for genetic selection  
319 of ruminant livestock in the UK, such as “heat tolerance” (Rivero et al., 2021).

320 The heat experienced in the UK in July 2022 was extreme by UK standards. However, livestock are  
321 successfully reared elsewhere in the world in places where such conditions are far more common and  
322 often more extreme. Consequently, there may be opportunities for the UK sector to learn from the  
323 experience of other countries as the climate warms. Government agencies such as the DEFRA may  
324 also wish to consider plans for future heat events that warrant Met Office ‘Red Weather Warnings’,  
325 such as restrictions and responsibilities that kick-in over such periods for the protection of livestock  
326 (e.g., reducing maximum travel time or pausing travel).

## 327 **5 Conclusion**

328 The record-breaking heat of July 2022 must serve as warning to livestock production in the UK and  
329 elsewhere. We cannot know when the next such event will occur, how long it will last, or its intensity.  
330 However, we do know that these events will increase in likelihood and severity and whilst we must be  
331 wary of knee-jerk reactions, it is also necessary that we prepare today for the world of tomorrow. This  
332 will require that systems are designed to minimise heat stress risk were possible, such as through  
333 water and shade provision. But it may also mean that mechanisms are in place for such events, such as  
334 temporary limitations on transport and movement.

## 335 **6 Acknowledgements**

336 None.



## 337 **7 Financial support**

338 Rothamsted Research receives strategic funding from the Biotechnological and Biological Sciences  
339 Research Council (BBSRC) of the United Kingdom. Support in writing up the work was greatly  
340 received by BBSRC through the strategic program Soil to Nutrition (S2N; BBS/E/C/000I0320) and  
341 Growing Health (BB/X010953/1) at Rothamsted Research.

## 342 **8 Competing Interests**

343 The authors declare no competing interests.

## 344 **9 Ethical Approval**

345 No ethical approval was approved for this study.

## 346 **10 Author Contributions**

347 AC – Concept, study design, data analysis, writing

348 JR – Study design, data interpretation, writing.

## 349 **11 References**

- 350 Arias, R.A., Mader, T.L., 2011. Environmental factors affecting daily water intake on cattle finished  
351 in feedlots. *J. Anim. Sci.* 89, 245–251. <https://doi.org/10.2527/jas.2010-3014>
- 352 Beede, D., Bray, R., Bucklin, F., 1993. Planifique su estrategia contra el calor. *Venezuela Bov.* 7, 38–  
353 39.
- 354 Bernabucci, U., Lacetera, N., Baumgard, L.H., Rhoads, R.P., Ronchi, B., Nardone, A., 2010.  
355 Metabolic and hormonal acclimation to heat stress in domesticated ruminants. *Anim. Int. J.*  
356 *Anim. Biosci.* 4, 1167–1183. <https://doi.org/10.1017/S175173111000090X>
- 357 Berry, I.L., Shanklin, M.D., And H. D. Johnson, 1964. Dairy Shelter Design Based on Milk  
358 Production Decline as Affected by Temperature and Humidity. *Trans. ASAE* 7, 0329–0331.  
359 <https://doi.org/10.13031/2013.40772>
- 360 Carvajal, M.A., Alaniz, A.J., Gutiérrez-Gómez, C., Vergara, P.M., Sejian, V., Bozinovic, F., 2021.  
361 Increasing importance of heat stress for cattle farming under future global climate scenarios.  
362 *Sci. Total Environ.* 801, 149661. <https://doi.org/10.1016/j.scitotenv.2021.149661>
- 363 DEFRA, 2022a. Historical statistics notices on the number of cattle, sheep and pigs slaughtered in the  
364 UK. Department for Environment, Food and Rural Affairs.
- 365 DEFRA, 2022b. Historical national statistics notices on milk utilisation by dairies. Department for  
366 Environment, Food and Rural Affairs.
- 367 Dunn, R.J.H., Mead, N.E., Willett, K.M., Parker, D.E., 2014. Analysis of heat stress in UK dairy  
368 cattle and impact on milk yields. *Environ. Res. Lett.* 9, 064006. <https://doi.org/10.1088/1748-9326/9/6/064006>
- 369
- 370 Galán, E., Llonch, P., Villagrà, A., Levit, H., Pinto, S., Prado, A. del, 2018. A systematic review of  
371 non-productivity-related animal-based indicators of heat stress resilience in dairy cattle.  
372 *PLOS ONE* 13, e0206520. <https://doi.org/10.1371/journal.pone.0206520>

- 373 Garner, J.B., Douglas, M., Williams, S.R.O., Wales, W.J., Marett, L.C., DiGiacomo, K., Leury, B.J.,  
374 Hayes, B.J., Garner, J.B., Douglas, M., Williams, S.R.O., Wales, W.J., Marett, L.C.,  
375 DiGiacomo, K., Leury, B.J., Hayes, B.J., 2017. Responses of dairy cows to short-term heat  
376 stress in controlled-climate chambers. *Anim. Prod. Sci.* 57, 1233–1241.  
377 <https://doi.org/10.1071/AN16472>
- 378 Google, 2021. Google Maps.
- 379 Hahn, G., Gaughan, J., Mader, T., Eigenberg, R., 2009. Chapter 5: Thermal Indices and Their  
380 Applications for Livestock Environments. *Livest. Energ. Therm. Environ. Manag.*  
381 <https://doi.org/10.13031/2013.28298>
- 382 Huuskonen, A., Tuomisto, L., Kauppinen, R., 2011. Effect of drinking water temperature on water  
383 intake and performance of dairy calves. *J. Dairy Sci.* 94, 2475–2480.  
384 <https://doi.org/10.3168/jds.2010-3723>
- 385 Igono, M.O., Bjotvedt, G., Sanford-Crane, H.T., 1992. Environmental profile and critical temperature  
386 effects on milk production of Holstein cows in desert climate. *Int. J. Biometeorol.* 36, 77–87.  
387 <https://doi.org/10.1007/BF01208917>
- 388 IPCC, 2022. Climate Change 2022: Impacts, Adaptation, and Vulnerability. Contrib. Work. Group II  
389 Sixth Assess. Rep. Intergov. Panel Clim. Change. <https://doi.org/10.1017/9781009325844>.
- 390 Jara, I.E., Keim, J.P., Arias, R.A., 2016. Behaviour, tympanic temperature and performance of dairy  
391 cows during summer season in southern Chile. *Arch. Med. Vet.* 48, 113–118.  
392 <https://doi.org/10.4067/S0301-732X2016000100014>
- 393 Lees, A.M., Sejian, V., Wallage, A.L., Steel, C.C., Mader, T.L., Lees, J.C., Gaughan, J.B., 2019. The  
394 Impact of Heat Load on Cattle. *Animals* 9, 322. <https://doi.org/10.3390/ani9060322>
- 395 Lerman, S., Contosta, A., 2019. Lawn mowing frequency and its effects on biogenic and  
396 anthropogenic carbon dioxide emissions. *Landsc. Urban Plan.* 182, 114–123.  
397 <https://doi.org/10.1016/j.landurbplan.2018.10.016>
- 398 Mader, T.L., Davis, M.S., Brown-Brandl, T., 2006. Environmental factors influencing heat stress in  
399 feedlot cattle. *J. Anim. Sci.* 84, 712–719. <https://doi.org/10.2527/2006.843712x>
- 400 Mader, T.L., Gaughan, J.B., Johnson, L.J., Hahn, G.L., 2010a. Tympanic temperature in confined  
401 beef cattle exposed to excessive heat load. *Int. J. Biometeorol.* 54, 629–635.  
402 <https://doi.org/10.1007/s00484-009-0229-0>
- 403 Mader, T.L., Johnson, L.J., Gaughan, J.B., 2010b. A comprehensive index for assessing  
404 environmental stress in animals. *J. Anim. Sci.* 88, 2153–2165.  
405 <https://doi.org/10.2527/jas.2009-2586>
- 406 Meehl, G.A., Tebaldi, C., 2004. More Intense, More Frequent, and Longer Lasting Heat Waves in the  
407 21st Century. *Science* 305, 994–997. <https://doi.org/10.1126/science.1098704>
- 408 Met Office, 2022. UK prepares for historic hot spell [WWW Document]. Met Off. URL  
409 [https://www.metoffice.gov.uk/about-us/press-office/news/weather-and-climate/2022/red-](https://www.metoffice.gov.uk/about-us/press-office/news/weather-and-climate/2022/red-extreme-heat-warning)  
410 [extreme-heat-warning](https://www.metoffice.gov.uk/about-us/press-office/news/weather-and-climate/2022/red-extreme-heat-warning) (accessed 7.27.22).
- 411 Met Office, 2012. Met Office (2012): Met Office Integrated Data Archive System (MIDAS) Land and  
412 Marine Surface Stations Data (1853-current) [WWW Document]. NCAS Br. Atmospheric  
413 Data Cent. URL <http://catalogue.ceda.ac.uk/uuid/220a65615218d5c9cc9e4785a3234bd0>
- 414 Minson, D., 2012. Forage in Ruminant Nutrition. Elsevier.
- 415 NASA, 2022. NASA Worldview [WWW Document]. URL <https://worldview.earthdata.nasa.gov/>
- 416 Ouellet, V., Cabrera, V.E., Fadul-Pacheco, L., Charbonneau, É., 2019. The relationship between the  
417 number of consecutive days with heat stress and milk production of Holstein dairy cows  
418 raised in a humid continental climate. *J. Dairy Sci.* 102, 8537–8545.  
419 <https://doi.org/10.3168/jds.2018-16060>
- 420 Parish, J., Karisch, B., 2022. Beef Cattle Water Requirements and Source Management (No. P2490).  
421 Mississippi State University.
- 422 Petersen, M.K., Muscha, J.M., Mulliniks, J.T., Roberts, A.J., 2016. Water temperature impacts water  
423 consumption by range cattle in winter1. *J. Anim. Sci.* 94, 4297–4306.  
424 <https://doi.org/10.2527/jas.2015-0155>
- 425 QGIS, 2022. QGIS Geographic Information System.
- 426 R Core Team, 2021. R: A language and environment for statistical computing.

- 427 R Studio Team, 2020. RStudio: Integrated Development for R. RStudio.  
428 Rivero, M.J., Eisler, M. C., Takahashi, T., Lee, M.R.F., 2021. Key traits for ruminant livestock across  
429 diverse production systems in the context of climate change: perspectives from a global  
430 platform of research farms. *Reprod. Fertil. Dev.* 33, 1–19. <https://doi.org/10.1071/RD20205>  
431 Rivero, M.J., Lee, M.R.F., 2022. A perspective on animal welfare of grazing ruminants and its  
432 relationship with sustainability. *Anim. Prod. Sci.* <https://doi.org/10.1071/AN21516>  
433 Scott, I.M., Johnson, H.D., Hahn, G.L., 1983. Effect of programmed diurnal temperature cycles on  
434 plasma thyroxine level, body temperature, and feed intake of holstein dairy cows. *Int. J.*  
435 *Biometeorol.* 27, 47–62. <https://doi.org/10.1007/BF02186300>  
436 Summer, A., Lora, I., Formaggioni, P., Gottardo, F., 2019. Impact of heat stress on milk and meat  
437 production. *Anim. Front.* 9, 39–46. <https://doi.org/10.1093/af/vfy026>  
438 Urbanek, S., Horner, J., 2020. Cairo: R Graphics Device using Cairo Graphics Library for Creating  
439 High-Quality Bitmap (PNG, JPEG, TIFF), Vector (PDF, SVG, PostScript) and Display (X11  
440 and Win32) Output.  
441 West, J.W., 2003. Effects of heat-stress on production in dairy cattle. *J. Dairy Sci.* 86, 2131–2144.  
442 [https://doi.org/10.3168/jds.S0022-0302\(03\)73803-X](https://doi.org/10.3168/jds.S0022-0302(03)73803-X)  
443 Wickham, H., 2016. *ggplot2: Elegant Graphics for Data Analysis*.  
444 Winchester, C.F., Morris, M.J., 1956. Water Intake Rates of Cattle. *J. Anim. Sci.* 15, 722–740.  
445 <https://doi.org/10.2527/jas1956.153722x>  
446 Yan, G., Li, H., Shi, Z., 2021. Evaluation of Thermal Indices as the Indicators of Heat Stress in Dairy  
447 Cows in a Temperate Climate. *Anim. Open Access J. MDPI* 11, 2459.  
448 <https://doi.org/10.3390/ani11082459>  
449
